# Supplementary material
Source: PubMed Central journal article supplement (PMC6805136)
Supplement: NIHMS980941-supplement-Supplemental_Table_2.pdf [file NIHMS980941-supplement-Supplemental_Table_2.pdf]

Supplemental Table 2. Sample sizes, primary outcome, secondary outcomes, and discriminant items by letter condition for Experiments 1-3

| Variables                                   | Experiment 1<br>Liberal arts university |                                |                                | Experiment 2<br>Community college  |                                    |                                   | Experiment 3<br>Mechanical Turk    |                                    |                                    |
|---------------------------------------------|-----------------------------------------|--------------------------------|--------------------------------|------------------------------------|------------------------------------|-----------------------------------|------------------------------------|------------------------------------|------------------------------------|
|                                             | Infographic<br>letter                   | Control<br>letter              | Difference*                    | Infographic<br>letter              | Control<br>letter                  | Difference                        | Infographic<br>letter              | Control<br>letter                  | Difference                         |
|                                             | Estimate<br>(95% CI)                    | Estimate<br>(95% CI)           | Difference*<br>(95% CI)        | Estimate<br>(95% CI)               | Estimate<br>(95% CI)               | Difference<br>(95% CI)            | Estimate<br>(95% CI)               | Estimate<br>(95% CI)               | Difference<br>(95% CI)             |
| <b>Sample size</b>                          | <b>42</b>                               | <b>35</b>                      |                                | <b>204</b>                         | <b>202</b>                         |                                   | <b>177</b>                         | <b>174</b>                         |                                    |
| <b>Primary outcome</b>                      |                                         |                                |                                |                                    |                                    |                                   |                                    |                                    |                                    |
| Knowledge, correctly answered question, %   | 90.5%<br>(77.4-97.3)                    | 74.3%<br>(56.7-87.5)           | 16.2%<br>(-6.5-37.7)           | <b>63.2%</b><br><b>(56.2-69.9)</b> | <b>48.5%</b><br><b>(41.4-55.6)</b> | <b>14.7%</b><br><b>(4.8-24.2)</b> | <b>88.7%</b><br><b>(83.1-93.0)</b> | <b>66.7%</b><br><b>(59.1-73.6)</b> | <b>22.0%</b><br><b>(11.7-32.2)</b> |
| <b>Secondary outcomes<sup>†</sup></b>       |                                         |                                |                                |                                    |                                    |                                   |                                    |                                    |                                    |
| Transparency of organization, mean          | <b>3.8</b><br><b>(3.5-4.1)</b>          | <b>2.9</b><br><b>(2.5-3.3)</b> | <b>0.8</b><br><b>(0.4-1.3)</b> | <b>3.7</b><br><b>(3.6-3.9)</b>     | <b>3.2</b><br><b>(3.0-3.3)</b>     | <b>0.6</b><br><b>(0.4-0.8)</b>    | <b>4.6</b><br><b>(4.5-4.7)</b>     | <b>3.6</b><br><b>(3.5-3.8)</b>     | <b>0.9</b><br><b>(0.7-1.1)</b>     |
| Value of retention, mean <sup>††</sup>      | 3.8<br>(3.5-4.1)                        | 3.3<br>(2.9-3.6)               | <b>0.5</b><br><b>(0.1-1.0)</b> | 3.9<br>(3.8-4.1)                   | 3.7<br>(3.6-3.9)                   | 0.2<br>(0.0-0.4)                  | <b>4.7</b><br><b>(4.6-4.8)</b>     | <b>4.3</b><br><b>(4.2-4.5)</b>     | <b>0.4</b><br><b>(0.2-0.6)</b>     |
| Trust of organization, mean                 | <b>3.2</b><br><b>(2.9-3.5)</b>          | <b>2.3</b><br><b>(2.0-2.5)</b> | <b>0.9</b><br><b>(0.5-1.3)</b> | 2.9<br>(2.8-3.1)                   | 2.7<br>(2.6-2.9)                   | 0.2<br>(0.0-0.4)                  | <b>4.1</b><br><b>(4.0-4.2)</b>     | <b>3.7</b><br><b>(3.5-3.8)</b>     | <b>0.4</b><br><b>(0.3-0.6)</b>     |
| <b>Discriminant items<sup>†</sup></b>       |                                         |                                |                                |                                    |                                    |                                   |                                    |                                    |                                    |
| Value of study outcome, mean <sup>†††</sup> | 4.2<br>(4.0-4.4)                        | 4.1<br>(3.8-4.3)               | 0.2<br>(-0.2-0.5)              | 4.2<br>(4.0-4.3)                   | 4.2<br>(4.0-4.3)                   | 0.0<br>(-0.2-0.2)                 | 4.2<br>(4.0-4.3)                   | 4.2<br>(4.0-4.3)                   | 0.0<br>(-0.2-0.2)                  |
| Keep commitments, mean                      | 3.9<br>(3.6-4.2)                        | 4.1<br>(3.8-4.3)               | -0.2<br>(-0.5-0.2)             | 4.2<br>(4.1-4.3)                   | 4.2<br>(4.1-4.4)                   | -0.1<br>(-0.2-0.1)                | 4.5<br>(4.4-4.6)                   | 4.3<br>(4.2-4.4)                   | 0.1<br>(0.0-0.3)                   |

\*Absolute differences in percentages (or absolute differences in means) between the two letter conditions. Cohen's d effect sizes were almost identical to the absolute difference in means for each of the continuous secondary outcomes and discriminant items across all three samples given the pooled standard deviations of the differences ranged from 0.7-1.1.

<sup>†</sup>Secondary outcomes and discriminant items were assessed with 5-point scales scored 1-5 with the following response options (Not at all, A little bit, Moderately, Quite a bit, Extremely).

<sup>††</sup>Value of retention: It is important to me that I complete the survey at the end of the program, whether or not I eat more fruits & vegetables.

<sup>†††</sup>Value of study outcome: It is important to me that I eat more fruits & vegetables.

Please cite Supplemental Table 2 as: Kiernan M, Opezzo MA, Resnicow K, Alexander GL. Effects of a methodological infographic on research participants' knowledge, transparency, and trust. Health Psychol 2018;37(8):782-786. PMID: 30024233. doi: 10.1037/hea0000631
